# Supplementary material
Source: PubMed Central journal article supplement (PMC8989009)
Supplement: flgastro-2020-101506supp001.pdf [file flgastro-2020-101506supp001.pdf]

**Supplementary figures**

**Supplementary Figure 1.** Total cost of IDA management per 100,000 population across CCGs 2017/18

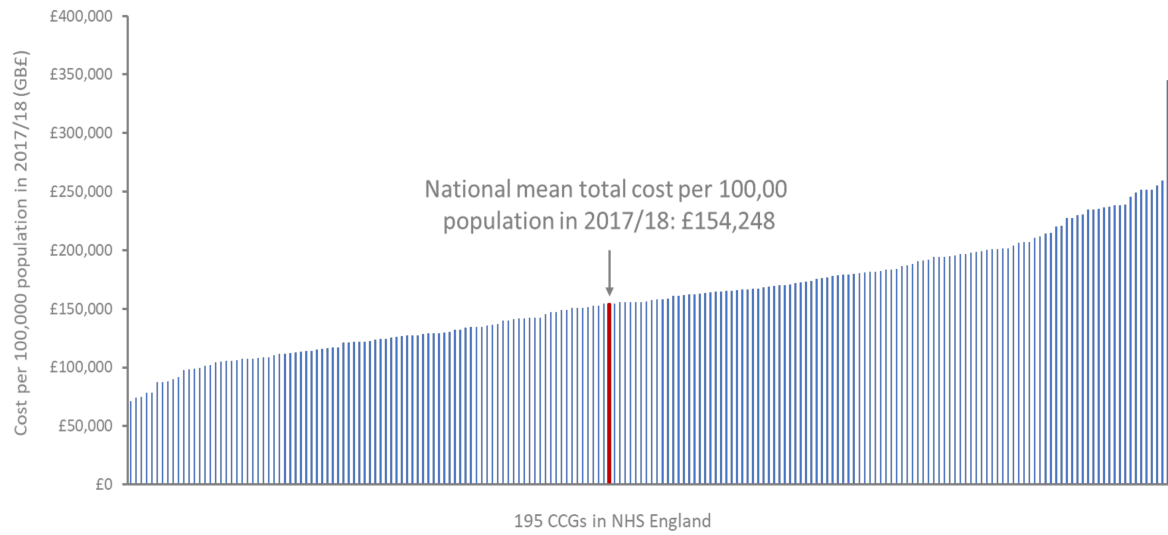

CCG, Clinical Commissioning Groups; GB, Great Britain; IDA, iron deficiency anaemia.

**Supplementary Figure 2.** Annual mean LOS, in NHS England between 2012/13 and 2017/18\*

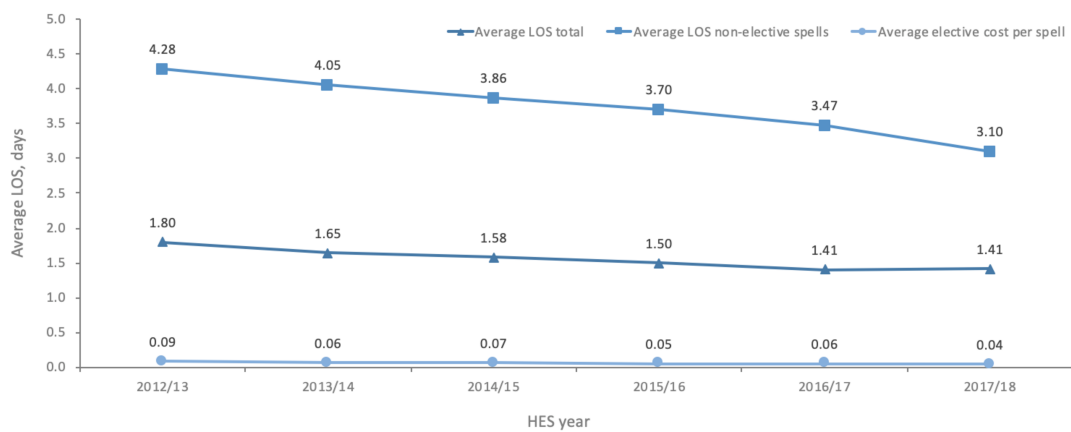

\*When IDA was the primary diagnosis.

DC, day case; GB, Great Britain; IDA, iron deficiency anaemia; LOS, length of stay;

**Supplementary Figure 3.** Correlation between oral iron prescriptions and non-elective admissions for IDA in CCGs in England

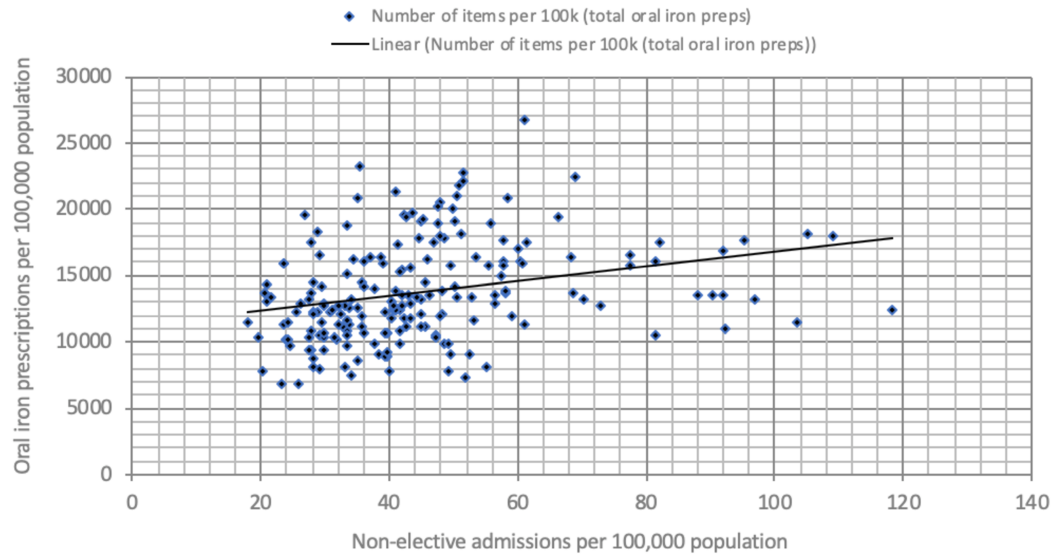

CCG, Clinical Commissioning Groups; IDA, iron deficiency anaemia.

**Supplementary Figure 4.** (a) Number and (b) cost of oral iron prescriptions, and (c) number and (d) cost of IV iron prescriptions, between 2012/13 and 2017/18 (per 100,000 population)

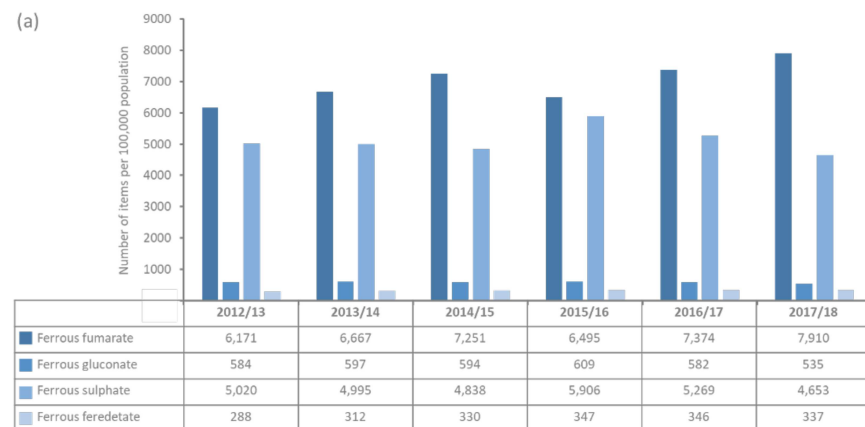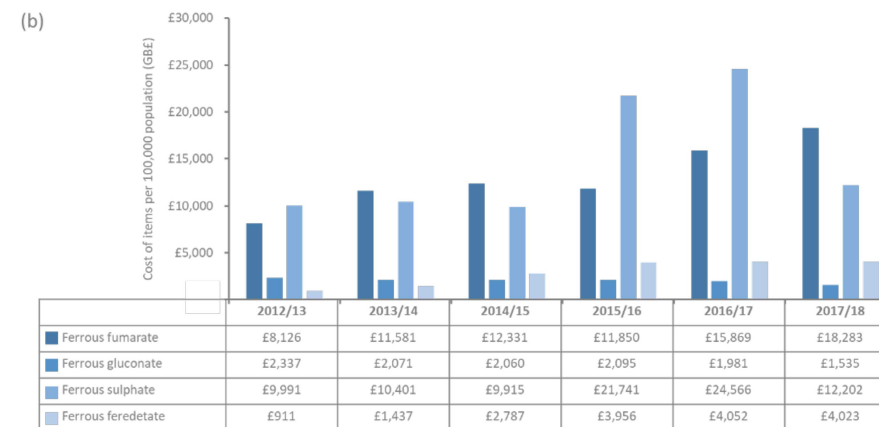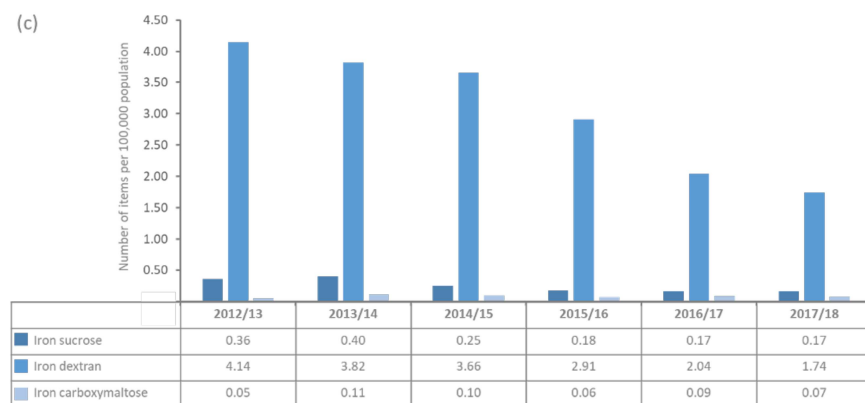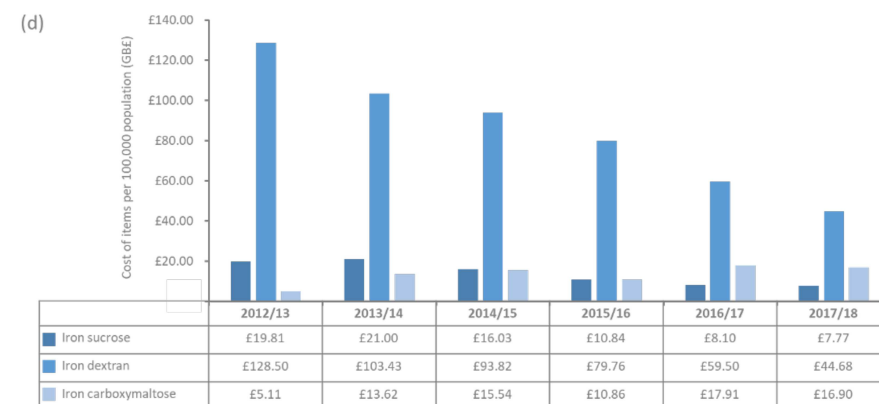

GB, Great Britain; IV, intravenous.

**Supplementary Table 1:** Total number and cost of oral iron and IV iron prescriptions per 100,000 population, and total number of blood transfusions between 2012/13 and 2017/18

| HES year | All prescriptions for oral irons per 100,000 population | Total cost of all oral iron prescriptions per 100,000 population | All prescriptions for IV irons per 100,000 population | Total cost of all oral iron prescriptions per 100,000 population | All IV blood transfusions |
|----------|---------------------------------------------------------|------------------------------------------------------------------|-------------------------------------------------------|------------------------------------------------------------------|---------------------------|
| 2012/13  | 12,236                                                  | £22,032                                                          | 4.6                                                   | £153.42                                                          | 1,981                     |
| 2013/14  | 12,731                                                  | £26,158                                                          | 4.3                                                   | £138.05                                                          | 2,219                     |
| 2014/15  | 13,169                                                  | £27,776                                                          | 4.0                                                   | £125.39                                                          | 2,509                     |
| 2015/16  | 13,504                                                  | £40,314                                                          | 3.2                                                   | £101.45                                                          | 2,670                     |
| 2016/17  | 13,708                                                  | £47,130                                                          | 2.3                                                   | £85.50                                                           | 2,984                     |
| 2017/18  | 13,549                                                  | £36,569                                                          | 2.0                                                   | £69.36                                                           | 3,271                     |

IV, intravenous.
